# Supplementary material for: Dynamic climate emulators for solar geoengineering
Source: Copernicus journal article supplement (doi:10.5194/acp-16-15789-2016), 2016-12-22
Supplement: Supplementary file 1 [file acp-16-15789-2016-supplement.zip]

Archive with 3 entries (3 files):
- emulatorSM_revised.pdf
- suppdat.mat
- acp-16-15789-2016-supplement-title-page.pdf
