# Supplementary material for: Dynamic climate emulators for solar geoengineering
Source: Copernicus journal article supplement (doi:10.5194/acp-16-15789-2016), 2016-12-22
Supplement: Supplementary file 1 [file acp-16-15789-2016-supplement.zip › acp-16-15789-2016-supplement-title-page.pdf]

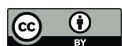

## *Supplement of* **Dynamic climate emulators for solar geoengineering**

**Douglas G. MacMartin and Ben Kravitz**

*Correspondence to:* Douglas G. MacMartin ([dgm224@cornell.edu](mailto:dgm224@cornell.edu))

- [acp-16-15789-2016-supplement-title-page.pdf](#)
- [emulatorSM\\_revised.pdf](#)
- [suppdatt.mat](#)

The copyright of individual parts of the supplement might differ from the CC-BY 3.0 licence.
